# Supplementary material for: Investigating Olfactory Gene Variation and Odour Identification in Older Adults
Source: MDPI journal article supplement (doi:10.3390/genes12050669), 2021-04-29
Supplement: s1 [file s1]

**Supplementary Materials:****Supplementary Table S1.** *Candidate SNPs previously associated with olfaction*

| Chromosome | Candidate Gene | SNP <sup>1</sup> | Olfactory Test Administered                   | Author, (year)                              |
|------------|----------------|------------------|-----------------------------------------------|---------------------------------------------|
| 1          | N/A            | rs75904654       | BSIT                                          | Dong et al. (2017)                          |
| 2          | OR2J3          | rs4674229        | C3HEX identification and threshold test       | Jaeger et al. (2010)<br>McRae et al. (2012) |
| 4          | N/A            | rs72679931       | BSIT                                          | Dong et al. (2017)                          |
| 4          | N/A            | rs41524648       | C3HEX                                         | Jaeger et al. (2010)                        |
| 5          | N/A            | rs4865875        | BSIT +SST                                     | Dong et al. (2015)                          |
| 6          | N/A            | rs9295791        | C3HEX                                         | Jaeger et al. (2010)                        |
| 6          | N/A            | rs4715057        | BSIT +SST                                     | Dong et al. (2015)                          |
| 6          | N/A            | rs9321099        | BSIT +SST                                     | Dong et al. (2015)                          |
| 8          | DLGAP2         | rs34276508       | BSIT +SST                                     | Dong et al. (2015)                          |
| 8          | N/A            | rs1478043        | C3HEX                                         | Jaeger et al. (2010)                        |
| 8          | N/A            | rs7000385        | C3HEX                                         | Jaeger et al. (2010)                        |
| 8          | N/A            | rs2730141        | BSIT                                          | Dong et al. (2017)                          |
| 9          | N/A            | rs16932288       | C3HEX                                         | Jaeger et al. (2010)                        |
| 9          | N/A            | rs4442206        | BSIT                                          | Dong et al. (2017)                          |
| 9          | N/A            | rs6560178        | BSIT                                          | Dong et al. (2017)                          |
| 9          | N/A            | rs16936969       | C3HEX                                         | Jaeger et al. (2010)                        |
| 9          | N/A            | rs2245691        | BSIT +SST                                     | Dong et al. (2015)                          |
| 9          | PLPPR1         | rs2251885        | BSIT +SST                                     | Dong et al. (2015)                          |
| 9          | N/A            | rs193020892      | BSIT                                          | Dong et al. (2017)                          |
| 10         | N/A            | rs11200795       | C3HEX                                         | Jaeger et al. (2010)                        |
| 11         | N/A            | rs7938698        | C3HEX                                         | Jaeger et al. (2010)                        |
| 11         | OR5A1          | rs6591536        | $\beta$ -ionone sensitivity test              | Jaeger et al. (2013)                        |
| 11         | N/A            | rs605843         | SST                                           | Dong et al. (2015)                          |
| 12         | N/A            | rs1313543        | BSIT                                          | Dong et al. (2017)                          |
| 12         | N/A            | rs1313545        | BSIT                                          | Dong et al. (2017)                          |
| 12         | N/A            | rs12229599       | BSIT +SST                                     | Dong et al. (2015)                          |
| 12         | N/A            | rs3751196        | BSIT +SST                                     | Dong et al. (2015)                          |
| 13         | N/A            | rs17252438       | BSIT +SST                                     | Dong et al. (2015)                          |
| 15         | N/A            | rs78633367       | BSIT                                          | Dong et al. (2017)                          |
| 16         | N/A            | rs964745         | C3HEX                                         | Jaeger et al. (2010)                        |
| 16         | N/A            | rs6564086        | BSIT                                          | Dong et al. (2017)                          |
| 17         | N/A            | rs199443         | BSIT +SST                                     | Dong et al. (2015)                          |
| 18         | N/A            | rs16951602       | BSIT                                          | Dong et al. (2017)                          |
| 19         | OR7D4          | rs5020278        | Androstenone & androstadienone threshold test | Keller et al. (2007)                        |
| 20         | N/A            | rs6052484        | BSIT +SST                                     | Dong et al. (2015)                          |
| 20         | N/A            | rs362582         | C3HEX                                         | Jaeger et al. (2010)                        |

**Notes:** C3HEX:cis-3-hexen-1-ol identification and threshold test, SST: 12 item Sniffin' Sticks screening identification test, BSIT:12 odorant Brief Smell Identification Test.

**Supplementary Table S2.** *Data sources used for calculation of PRS scores*

| Polygenic Risk Score                | Data Source                                                                                                                   | Reference                                                                                                                                                                                                                                                                 |
|-------------------------------------|-------------------------------------------------------------------------------------------------------------------------------|---------------------------------------------------------------------------------------------------------------------------------------------------------------------------------------------------------------------------------------------------------------------------|
| Smoking                             | UK Biobank (1239.ukbb.sumstats.gz)                                                                                            | <a href="http://ldsc.broadinstitute.org/gwashare/">http://ldsc.broadinstitute.org/gwashare/</a> ).                                                                                                                                                                        |
| Alzheimer's Disease (AD)            | <a href="https://www.ebi.ac.uk/gwas/downloads/summary-statistics">https://www.ebi.ac.uk/gwas/downloads/summary-statistics</a> | Kunkle et al. Genetic meta-analysis of diagnosed Alzheimer's disease identifies new risk loci and implicates A $\beta$ , tau, immunity and lipid processing. Nat Genetics. 2019. 51:414-430. doi:10.1038/s41588-019-0358-2                                                |
| Hippocampal Volume (HV)             | ENIGMA and CHARGE Consortia                                                                                                   | Hibar, D. Stein, J.L., et al. Common genetic variants influence human subcortical structures. Nature. 2015. 520:224-9. doi: 10.1038/nature14101                                                                                                                           |
| Parkinson's Disease (PD)            | <a href="https://www.ebi.ac.uk/gwas/downloads/summary-statistics">https://www.ebi.ac.uk/gwas/downloads/summary-statistics</a> | Blauwendraat C, Heilbron K, Valerga CL, et al. Parkinson's disease age at onset genome-wide association study: Defining heritability, genetic loci, and $\alpha$ -synuclein mechanisms. Mov Disord. 2019;34(6):866-875. doi:10.1002/mds.27659                             |
| White Matter Hyperintensities (WMH) | <a href="https://www.ebi.ac.uk/gwas/downloads/summary-statistics">https://www.ebi.ac.uk/gwas/downloads/summary-statistics</a> | Traylor M, Tozer DJ, Croall ID, et al. Genetic variation in PLEKHG1 is associated with white matter hyperintensities (n = 11,226) [published correction appears in Neurology. 2019 Sep 24;93(13):608]. Neurology. 2019;92(8):e749-e757. doi:10.1212/WNL.00000000000006952 |

**Supplementary Table S3.** Associations between potential covariates and individual BSIT items and total BSIT score

| BSIT item        | Odour         | Age     |      |          | Sex     |      |          | Smoking status |      |          | APOE $\epsilon 4$ carrier status |      |          | NESB status |      |          |
|------------------|---------------|---------|------|----------|---------|------|----------|----------------|------|----------|----------------------------------|------|----------|-------------|------|----------|
|                  |               | $\beta$ | S.E. | pval     | $\beta$ | S.E. | pval     | $\beta$        | S.E. | pval     | $\beta$                          | S.E. | pval     | $\beta$     | S.E. | pval     |
| 1                | Cinnamon      | -0.04   | 0.01 | 3.69E-03 | -0.25   | 0.16 | 1.25E-01 | -0.17          | 0.40 | 6.76E-01 | -0.45                            | 0.18 | 1.15E-02 | 0.25        | 0.28 | 3.66E-01 |
| 2                | Turpentine    | -0.02   | 0.01 | 7.71E-02 | -0.02   | 0.13 | 8.86E-01 | -1.30          | 0.48 | 6.32E-03 | 0.01                             | 0.15 | 9.54E-01 | -0.10       | 0.22 | 6.57E-01 |
| 3                | Lemon         | -0.04   | 0.01 | 2.42E-05 | -0.42   | 0.12 | 3.43E-04 | 0.01           | 0.29 | 9.63E-01 | -0.22                            | 0.13 | 9.14E-02 | 0.25        | 0.19 | 1.89E-01 |
| 4                | Smoke         | -0.07   | 0.01 | 2.72E-10 | -0.62   | 0.13 | 3.50E-06 | -1.43          | 0.28 | 3.42E-07 | -0.16                            | 0.15 | 3.07E-01 | 0.28        | 0.22 | 2.02E-01 |
| 5                | Chocolate     | 0.00    | 0.01 | 8.68E-01 | 0.08    | 0.15 | 5.89E-01 | -0.57          | 0.31 | 6.47E-02 | -0.25                            | 0.16 | 1.34E-01 | 0.12        | 0.25 | 6.38E-01 |
| 6                | Rose          | -0.06   | 0.01 | 1.90E-08 | -0.92   | 0.13 | 8.34E-13 | -0.20          | 0.32 | 5.35E-01 | -0.20                            | 0.15 | 1.74E-01 | -0.14       | 0.20 | 4.89E-01 |
| 7                | Paint Thinner | -0.08   | 0.02 | 3.46E-07 | -1.12   | 0.20 | 2.65E-08 | -0.74          | 0.42 | 7.60E-02 | 0.27                             | 0.24 | 2.60E-01 | 0.31        | 0.31 | 3.22E-01 |
| 8                | Banana        | -0.05   | 0.01 | 3.94E-05 | -0.19   | 0.14 | 1.85E-01 | -0.29          | 0.33 | 3.82E-01 | 0.24                             | 0.17 | 1.57E-01 | -0.29       | 0.21 | 1.62E-01 |
| 9                | Pineapple     | -0.06   | 0.01 | 1.37E-05 | -0.55   | 0.16 | 6.16E-04 | -0.02          | 0.42 | 9.58E-01 | -0.08                            | 0.19 | 6.60E-01 | -0.34       | 0.23 | 1.37E-01 |
| 10               | Gasoline      | -0.10   | 0.02 | 2.14E-09 | -1.04   | 0.21 | 9.33E-07 | -0.95          | 0.42 | 2.28E-02 | 0.05                             | 0.24 | 8.52E-01 | 0.16        | 0.31 | 6.19E-01 |
| 11               | Soap          | -0.06   | 0.02 | 1.63E-04 | -0.51   | 0.20 | 1.22E-02 | -0.64          | 0.43 | 1.32E-01 | -0.61                            | 0.21 | 4.41E-03 | -0.11       | 0.30 | 7.19E-01 |
| 12               | Onion         | -0.12   | 0.02 | 2.77E-11 | -0.96   | 0.21 | 3.85E-06 | -1.25          | 0.39 | 1.51E-03 | -0.05                            | 0.24 | 8.23E-01 | 0.67        | 0.36 | 5.99E-02 |
| BSIT Total Score |               | -0.01   | 0.00 | 1.13E-14 | -0.09   | 0.01 | 2.64E-11 | -0.11          | 0.03 | 4.68E-04 | -0.02                            | 0.02 | 1.97E-01 | 0.01        | 0.02 | 6.36E-01 |

**Notes:** Analyses were performed using GLMM adjusted for age and sex (coded as 0 [female] and 1 [male]).  $\beta$ : Beta coefficient; S.E.: standard error, pval: p-value.

**Supplementary Table S4.** Associations between polygenic risk scores based on GWAS threshold  $<5 \times 10^{-5}$ , for Alzheimer's disease (AD), white matter hyperintensities (WMH), smoking, Parkinson's Disease (PD), Hippocampal volume (HV) and individual BSIT total scores

1  
2  
3

| BSIT Item # | Polygenic Risk Score (PRS) | $\beta$ value for PRS | S.E. for PRS | P Value for PRS | FDR        |
|-------------|----------------------------|-----------------------|--------------|-----------------|------------|
| 1           | AD PRS                     | 0.234                 | 0.080        | 3.31E-03        | 0.982      |
| 1           | WMH PRS                    | -0.071                | 0.094        | 4.81E-01        | 0.982      |
| 1           | Smoking PRS                | -0.112                | 0.095        | 2.27E-01        | 0.982      |
| 1           | PD PRS                     | -0.009                | 0.086        | 9.16E-01        | 0.982      |
| 1           | HV PRS                     | 0.035                 | 0.083        | 6.77E-01        | 0.982      |
| 2           | AD PRS                     | -0.052                | 0.067        | 4.37E-01        | 0.982      |
| 2           | WMH PRS                    | -0.007                | 0.076        | 9.24E-01        | 0.982      |
| 2           | Smoking PRS                | 0.0003                | 0.078        | 9.96E-01        | 0.997      |
| 2           | PD PRS                     | -0.007                | 0.074        | 9.24E-01        | 0.982      |
| 2           | HV PRS                     | 0.049                 | 0.066        | 4.57E-01        | 0.982      |
| 3           | AD PRS                     | -0.823                | 0.058        | 1.57E-01        | 0.982      |
| 3           | WMH PRS                    | 0.068                 | 0.068        | 3.14E-01        | 0.982      |
| 3           | Smoking PRS                | -0.021                | 0.061        | 7.30E-01        | 0.982      |
| 3           | PD PRS                     | 0.044                 | 0.067        | 5.02E-01        | 0.982      |
| 3           | HV PRS                     | 0.055                 | 0.059        | 3.45E-01        | 0.982      |
| 4           | AD PRS                     | -0.538                | 0.066        | 4.17E-01        | 0.982      |
| 4           | WMH PRS                    | -0.093                | 0.076        | 2.21E-01        | 0.982      |
| 4           | Smoking PRS                | -0.004                | 0.078        | 9.63E-01        | 0.985      |
| 4           | PD PRS                     | -0.019                | 0.074        | 8.00E-01        | 0.982      |
| 4           | HV PRS                     | -0.023                | 0.067        | 7.27E-01        | 0.982      |
| 5           | AD PRS                     | -0.056                | 0.072        | 4.38E-01        | 0.982      |
| 5           | WMH PRS                    | -0.352                | 0.081        | 1.70E-05        | 0.001*     |
| 5           | Smoking PRS                | -0.451                | 0.084        | 8.87E-08        | 1.15E-05 * |
| 5           | PD PRS                     | -0.338                | 0.081        | 2.67E-05        | 0.001*     |
| 5           | HV PRS                     | 0.052                 | 0.072        | 4.71E-01        | 0.982      |
| 6           | AD PRS                     | -0.012                | 0.065        | 8.61E-01        | 0.982      |
| 6           | WMH PRS                    | -0.066                | 0.075        | 3.82E-01        | 0.982      |
| 6           | Smoking PRS                | 0.018                 | 0.076        | 8.14E-01        | 0.982      |
| 6           | PD PRS                     | -0.046                | 0.073        | 5.23E-01        | 0.982      |
| 6           | HV PRS                     | -0.055                | 0.066        | 4.06E-01        | 0.982      |
| 7           | AD PRS                     | 0.159                 | 0.100        | 1.13E-01        | 0.982      |
| 7           | WMH PRS                    | -0.155                | 0.113        | 1.72E-01        | 0.982      |
| 7           | Smoking PRS                | -0.014                | 0.114        | 9.02E-01        | 0.982      |
| 7           | PD PRS                     | -0.69                 | 0.109        | 5.28E-01        | 0.982      |
| 7           | HV PRS                     | 0.150                 | 0.097        | 1.23E-01        | 0.982      |
| 8           | AD PRS                     | 0.029                 | 0.070        | 6.76E-01        | 0.982      |
| 8           | WMH PRS                    | -0.016                | 0.080        | 8.37E-01        | 0.982      |
| 8           | Smoking PRS                | -0.078                | 0.081        | 3.32E-01        | 0.982      |
| 8           | PD PRS                     | 0.002                 | 0.078        | 7.97E-01        | 0.982      |
| 8           | HV PRS                     | -0.049                | 0.070        | 4.88E-01        | 0.982      |
| 9           | AD PRS                     | 0.036                 | 0.082        | 6.60E-01        | 0.982      |
| 9           | WMH PRS                    | 0.085                 | 0.095        | 3.72E-01        | 0.982      |
| 9           | Smoking PRS                | 0.021                 | 0.094        | 8.19E-01        | 0.982      |
| 9           | PD PRS                     | -0.008                | 0.091        | 9.33E-01        | 0.982      |
| 9           | HV PRS                     | -0.123                | 0.082        | 1.36E-01        | 0.982      |

|            |             |         |       |          |       |
|------------|-------------|---------|-------|----------|-------|
| 10         | AD PRS      | 0.086   | 0.105 | 4.09E-01 | 0.982 |
| 10         | WMH PRS     | 0.162   | 0.124 | 1.90E-01 | 0.982 |
| 10         | Smoking PRS | 0.095   | 0.122 | 4.37E-01 | 0.982 |
| 10         | PD PRS      | -0.049  | 0.114 | 6.67E-01 | 0.982 |
| 10         | HV PRS      | -0.097  | 0.103 | 7.95E-01 | 0.982 |
| 11         | AD PRS      | 0.064   | 0.106 | 5.47E-01 | 0.982 |
| 11         | WMH PRS     | -0.032  | 0.018 | 7.92E-01 | 0.982 |
| 11         | Smoking PRS | 0.126   | 0.124 | 3.08E-01 | 0.982 |
| 11         | PD PRS      | 0.067   | 0.117 | 5.68E-01 | 0.982 |
| 11         | HV PRS      | -0.029  | 0.105 | 7.82E-01 | 0.982 |
| 12         | AD PRS      | -0.018  | 0.104 | 8.60E-01 | 0.982 |
| 12         | WMH PRS     | -0.008  | 0.122 | 9.48E-01 | 0.982 |
| 12         | Smoking PRS | 0.093   | 0.125 | 4.55E-01 | 0.982 |
| 12         | PD PRS      | 0.061   | 0.118 | 6.02E-01 | 0.982 |
| 12         | HV PRS      | -0.029  | 0.105 | 3.08E-01 | 0.982 |
| BSIT Total | AD PRS      | -0.006  | 0.001 | 3.29E-01 | 0.982 |
| BSIT Total | WMH PRS     | -0.013  | 0.008 | 9.99E-02 | 0.982 |
| BSIT Total | Smoking PRS | -0.008  | 0.008 | 3.29E-01 | 0.982 |
| BSIT Total | PD PRS      | -0.011  | 0.008 | 1.85E-01 | 0.982 |
| BSIT Total | HV PRS      | -0.0008 | 0.007 | 9.10E-01 | 0.982 |

Notes. \* FDR  $p < .05$

## References

- Dong, J.; Wyss, A.; Yang, J.; Price, T.R.; Nicolas, A.; Nalls, M.; Tranah, G.; Franceschini, N.; Xu, Z.; Schulte, C.; et al. Genome-Wide Association Analysis of the Sense of Smell in U.S. Older Adults: Identification of Novel Risk Loci in African-Americans and European-Americans. *Molecular Neurobiology* **2017**, *54*, 8021–8032, doi:[10.1007/s12035-016-0282-8](https://doi.org/10.1007/s12035-016-0282-8).
- Dong, J.; Yang, J.; Tranah, G.; Franceschini, N.; Parimi, N.; Alkorta-Aranburu, G.; Xu, Z.; Alonso, A.; Cummings, S.R.; Fornage, M.; et al. Genome-Wide Meta-Analysis on the Sense of Smell Among US Older Adults. *Medicine* **2015**, *94*, e1892–e1892, doi:[10.1097/MD.0000000000001892](https://doi.org/10.1097/MD.0000000000001892).
- Jaeger, S.R.; McRae, J.F.; Salzman, Y.; Williams, L.; Newcomb, R.D. A Preliminary Investigation into a Genetic Basis for Cis-3-Hexen-1-ol Odour Perception: A Genome-Wide Association Approach. *Food Quality and Preference* **2010**, *21*, 121–131, doi:[10.1016/j.foodqual.2009.08.011](https://doi.org/10.1016/j.foodqual.2009.08.011).
- Keller, A.; Zhuang, H.; Chi, Q.; Vosshall, L.B.; Matsunami, H. Genetic Variation in a Human Odorant Receptor Alters Odour Perception. *Nature* **2007**, *449*, 468.
- McRae, J.F.; Mainland, J.D.; Jaeger, S.R.; Adipietro, K.A.; Matsunami, H.; Newcomb, R.D. Genetic Variation in the Odorant Receptor OR2J3 Is Associated with the Ability to Detect the “Grassy” Smelling Odor, Cis-3-Hexen-1-ol. *Chemical Senses* **2012**, *37*, 585–593, doi:[10.1093/chemse/bjs049](https://doi.org/10.1093/chemse/bjs049).
